# Supplementary material
Source: publisher figshare collection journal article supplement (https://gsajournals.figshare.com/ndownloader/files/27046424)
Supplement: Supplementary file 1 [file 27046424]

| **TABLE S2** | **Primate samples** |  |  |  |
| --- | --- | --- | --- | --- |
|  |  |  |  |  |
| **Common Name** | **Scientific Name** | **Source** | **Sample #** | **Cell Type** |
| Gorilla | *Gorilla gorilla* | Coriell | PR00280 | Fibroblasts |
| Sumatran Orangutan | *Pongo pygmaeus* | Coriell | PR01052 | B-Lymphocyte |
| Borneo Orangutan | *Pongo pygmaeus* | Coriell | PR00650 | B-Lymphocyte |
| Siamang | *Hylobates syndactylus* | Coriell | PR00722 | Fibroblasts |
| White-Cheeked Gibbon | *Hylobates leucogeny* | Coriell | PR01037 | Fibroblasts |
| Agile Gibbon | *Hylobates agilis* | Coriell | PR00773 | Fibroblasts |
| Rhesus | *Macaca mulatta* | W. Johnson | Mm265-95 | B-Lymphocyte |
| Talapoin | *Miopithecus talapoin* | Coriell | PR00716 | Fibroblasts |
| Colobus | *Colobus guereza* | Coriell | PR00980 | Fibroblasts |
| Leaf Monkey | *Trachypithecus francoisi* | Coriell | PR01099 | Fibroblasts |
| Crab-eating Macaque | *Macaca fascicularis* | Coriell | Mf103-06 | B-Lymphocyte |
| Olive Baboon | *Papio anubis* | Coriell | PR00978 | Fibroblasts |
| Black Mangabey | *Lophocebus albigena* | Coriell | PR01215 | Fibroblasts |
| Wolf's Guenon | *Cercopithecus wolfi* | Coriell | PR01241 | Fibroblasts |
